# Supplementary material for: Stabilization of Metastable Indomethacin α in Cellulose Nanocrystal Aerogel Scaffolds
Source: MDPI journal article supplement (doi:10.3390/pharmaceutics13040441), 2021-03-24
Supplement: s1 [file s1]

# Supplementary Materials: Stabilization of Metastable Indomethacin $\alpha$ in Cellulose Nanocrystal Aerogel Scaffolds

Manali Banerjee and Blair Brettmann

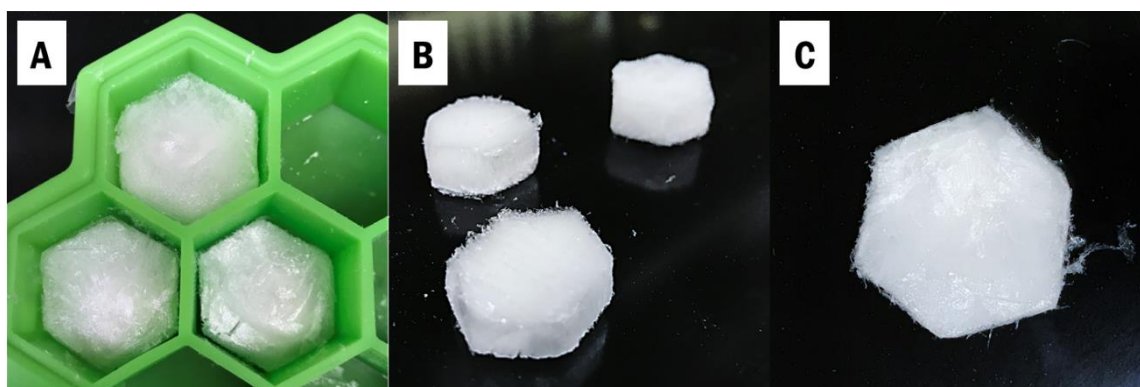

**Figure S1.** Images of cellulose nanocrystal aerogels a. In silicone tray used for casting, b. Side view, c. top down view

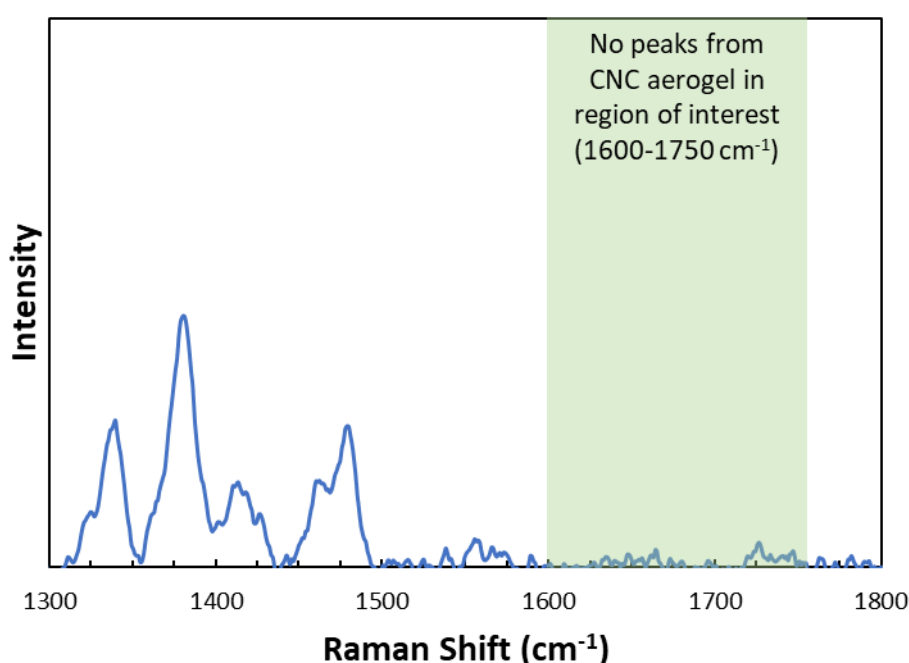

**Figure S2.** Raman spectra of cellulose nanocrystal aerogel showing no peaks in the region of interest for indomethacin polymorphs (1600–1750  $\text{cm}^{-1}$ )

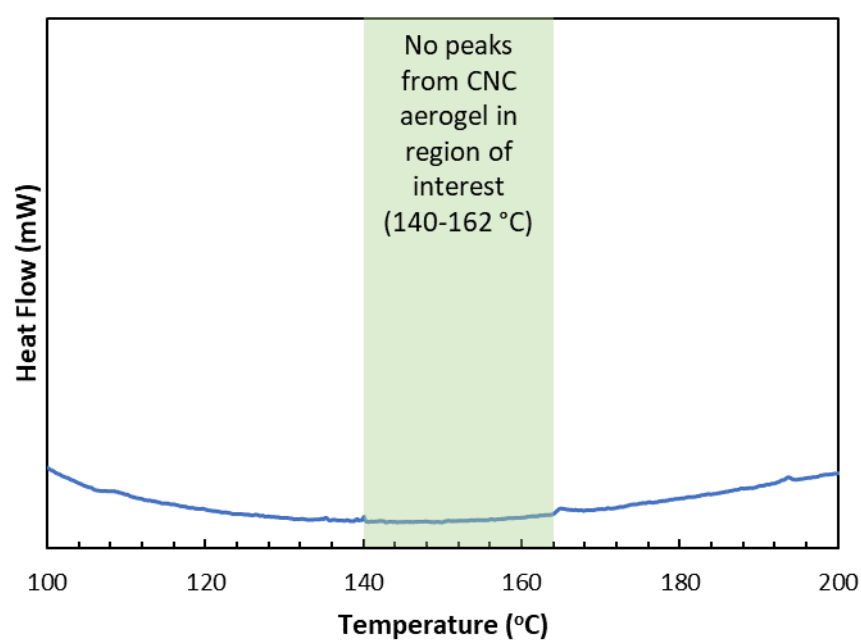

**Figure S3.** DSC thermogram of CNC aerogel showing no peaks in region of interest for indomethacin polymorphs (140–162 °C)
